# Supplementary material
Source: PubMed Central journal article supplement (PMC3173152)
Supplement: supp_M111.247866_jbc.M111.247866-1.pdf [file supp_M111.247866_jbc.M111.247866-1.pdf]

**A**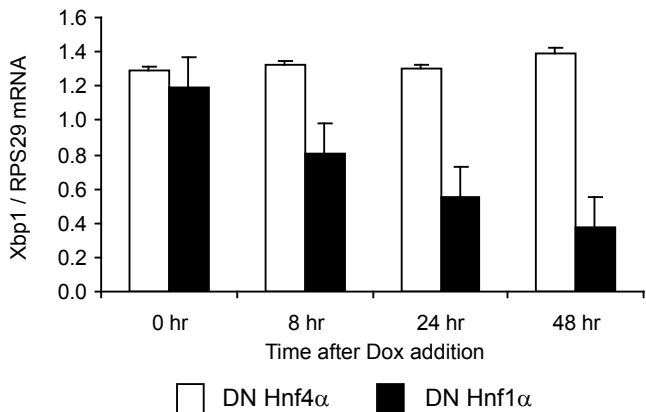**B**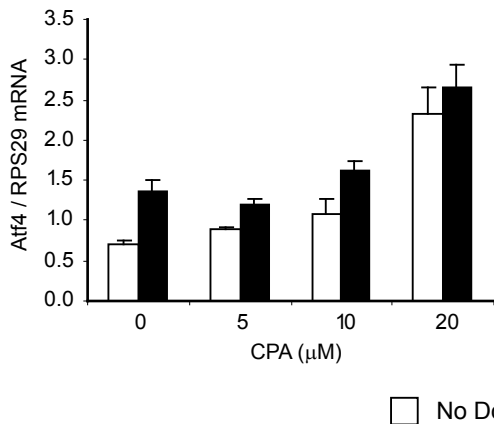**C**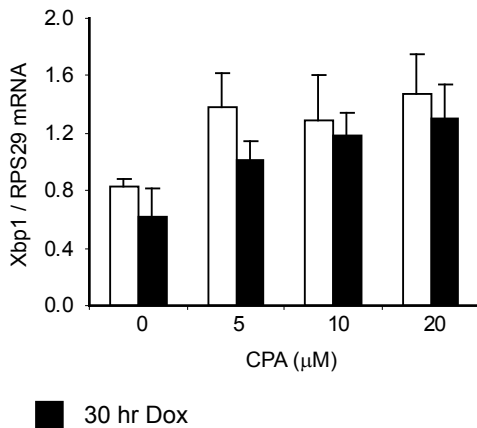

Supplemental Figure 1. (A) Timecourse of Xbp1 mRNA levels after Dox in DN Hnf4 $\alpha$  and DN Hnf1 $\alpha$  expressing cells. Transcription of Atf4 (B) and Xbp1 (C) in response to CPA is not affected by DN Hnf1 $\alpha$  induction.

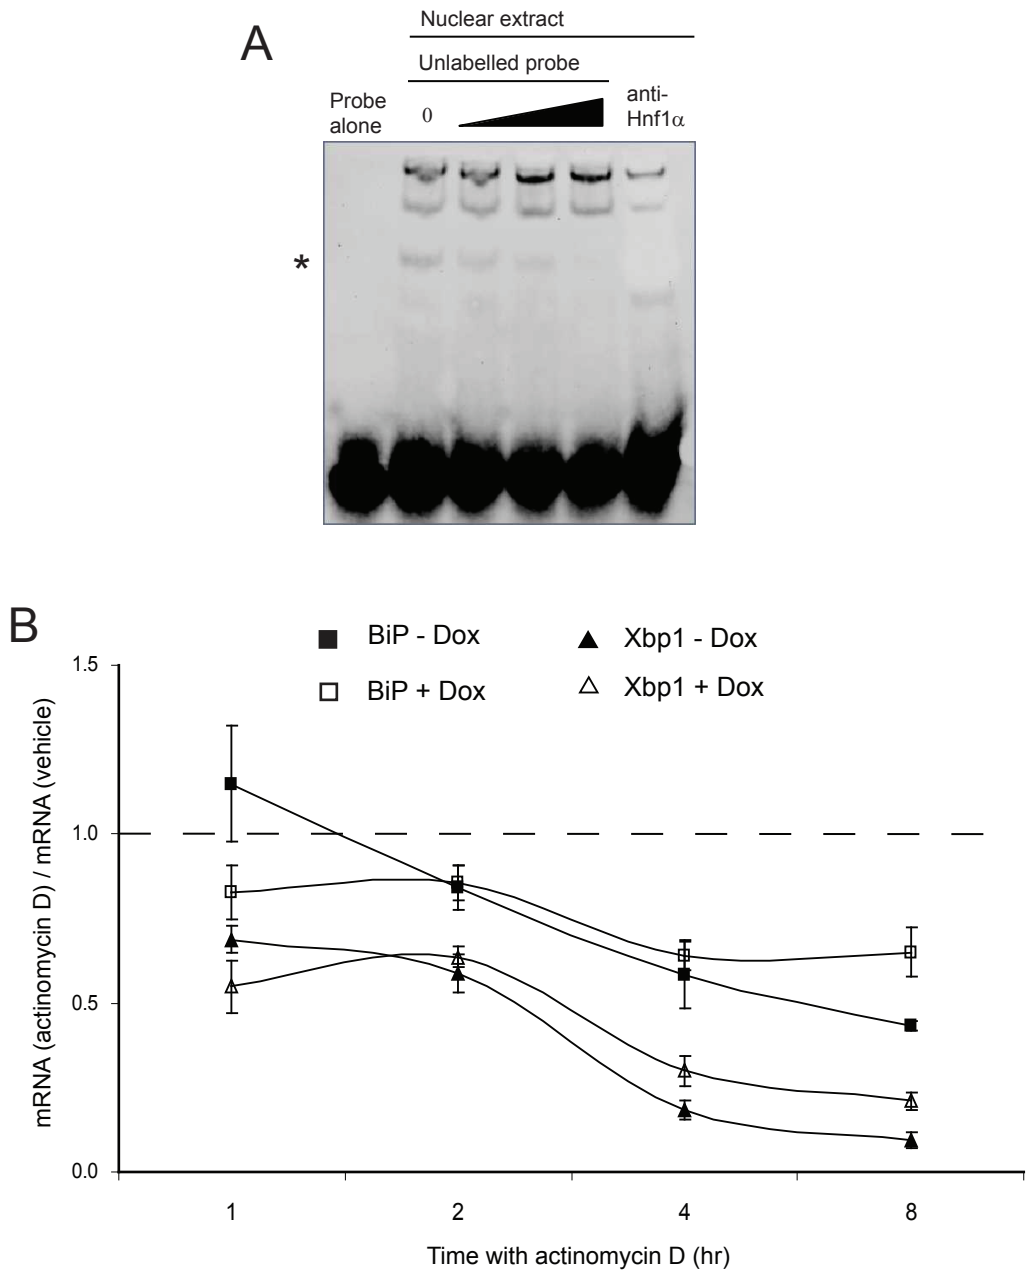

Supplemental Figure 2. (A) Competition EMSA to demonstrate specific binding of Hnf1 $\alpha$  to the Xbp1 promoter. The band corresponding to unique binding of Hnf1 $\alpha$  to the probe is marked with an asterisk. The unlabelled probe was used at 100x, 200x and 400x the concentration of the biotin-labelled probe. The nuclear extract was prepared from INS DN Hnf1 $\alpha$  cells without Dox. (B) Time course of BiP and Xbp1 mRNA degradation after ActD. INS DN Hnf1 $\alpha$  cells were cultured +/- Dox for 24 hr, vehicle (DMSO) or ActD (5  $\mu$ g/ml) was added and RNA collected at the indicated time points. Data are expressed as the ratio of mRNA in the ActD-treated sample to mRNA in the vehicle-treated control, mean  $\pm$  SEM of three to four independent experiments. The dotted line indicates a value of 1, corresponding to zero degradation of the RNA.

**A**

```

1 gtcaggctccagcg
   15 cagcaaaaca aagacaactg tgataaaagc tcacaccaca agagtttaga
aatgtgaaga
   75 aaaacaaaac caaatgtatt ctccctgtgc aaactttatt tattaatccc
tactacatg
  135 ctaaacaggg ttctgggtgtt ttcttttaa gttattaatt aattaatcaa
tcgattaatt
  195 tatgaaatag ggattgatct attgcttcag ctggcctaga cctctctatg
tagcccaggc
  255 tggcttcaag ctgcctataa agtgctgaga ttacaggcga gcaccaccct
actacatttc
  315 gttttgcaat aatctcattt cctaaacact cattttgtga aattccccag
gtctgtgtgt
  375 atgtgttgcg taactctaaa cgggatatgc caccagtttg attttcggct
gtactagga
  435 ccgatgtggc gccggacatt ataacgtggc cgggctatgg taacgatctg
tgagactcgg
  495 tttggaaatc tggcctgaga ggaaagcctg gcattccggg taaaagtctc
agctgtgtgg
  555 ggacgcgtct gccgaggacc ctggaccctg gacttcagca accggctgtc
tctaccgtcc
  615 acccacccta aggcccagct cgcacggcga acagctgggc agccacgctg
gacactcacc
  675 ccgcccgcgt tgagcccgcc cccgggctg caggccaat aaacgatgaa
tacagccgcg
  735 cgtcacgcag cacaggccaa tcgcagacgg ccacgaccct agaaaggctg
ggcgcggcag
  795 gcgggccacgg ggcggtggcg gcgctggcgt agacgtttcc tggctatggt
ggtggtggca
  855 gcggcgcoga gcgcggcctc ggcgcccccc aaagtgctac tcctatctgg
tcagcccgcc
  915 tccggcggcc gagcgcctgcc gctcatggtt ccggg

```

**B**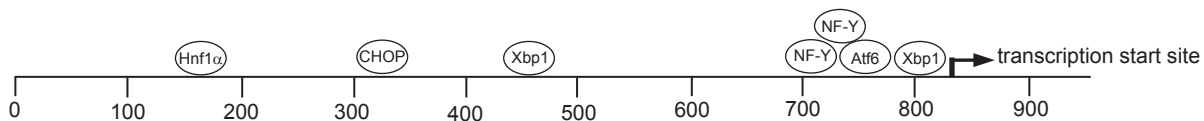

Supplemental Figure 3. (A) Sequence of the cloned Xbp1 promoter with putative transcription factor binding sites coloured as follows: red, Hnf1 $\alpha$ ; blue, CHOP; orange, Xbp1; green, NF-Y; magenta, Atf6. The transcription start site is underlined. (B) Graphical representation of the cloned promoter indicating the positions of putative transcription factor binding sites. Sites were detected by comparison against the TransFac database with the program Match set to minimise false negatives.

**A**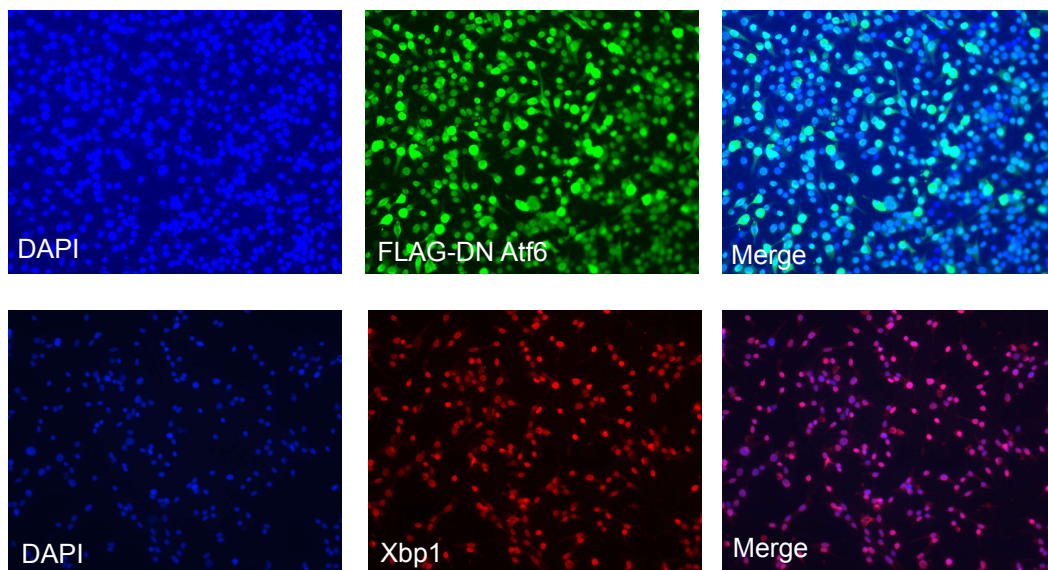**B**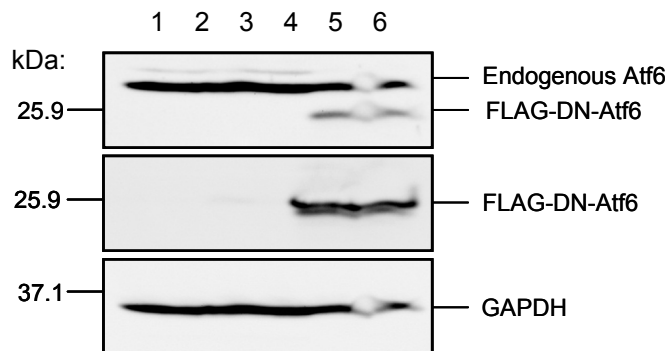

Supplemental Figure 4. (A) 20 adenovirus units per cell of Ad-DN Atf6 and Ad-DN Xbp1 is sufficient to achieve infection rates approaching 100 %. When immunofluorescence was performed under these conditions in the absence of adenovirus, no fluorescence was visible for either of the antibodies. Images are at 20 x magnification. (B) Control Western blotting of extracts from INS-1E cells (lanes 1 and 2), INS-1E + Ad-LacZ adenovirus (lanes 3 and 4) and INS-1E + Ad-DN-Atf6 adenovirus (lanes 5 and 6). Extracts for each condition were prepared from separate cell cultures. The anti-Atf6 antibody was from Santa Cruz (#sc-22799) since the antibody used in Figure 4 did not recognise the DN-Atf6 from the adenovirus. Top panel, anti-Atf6; middle panel, anti-FLAG (Sigma Aldrich); bottom panel, anti-GAPDH (Millipore).

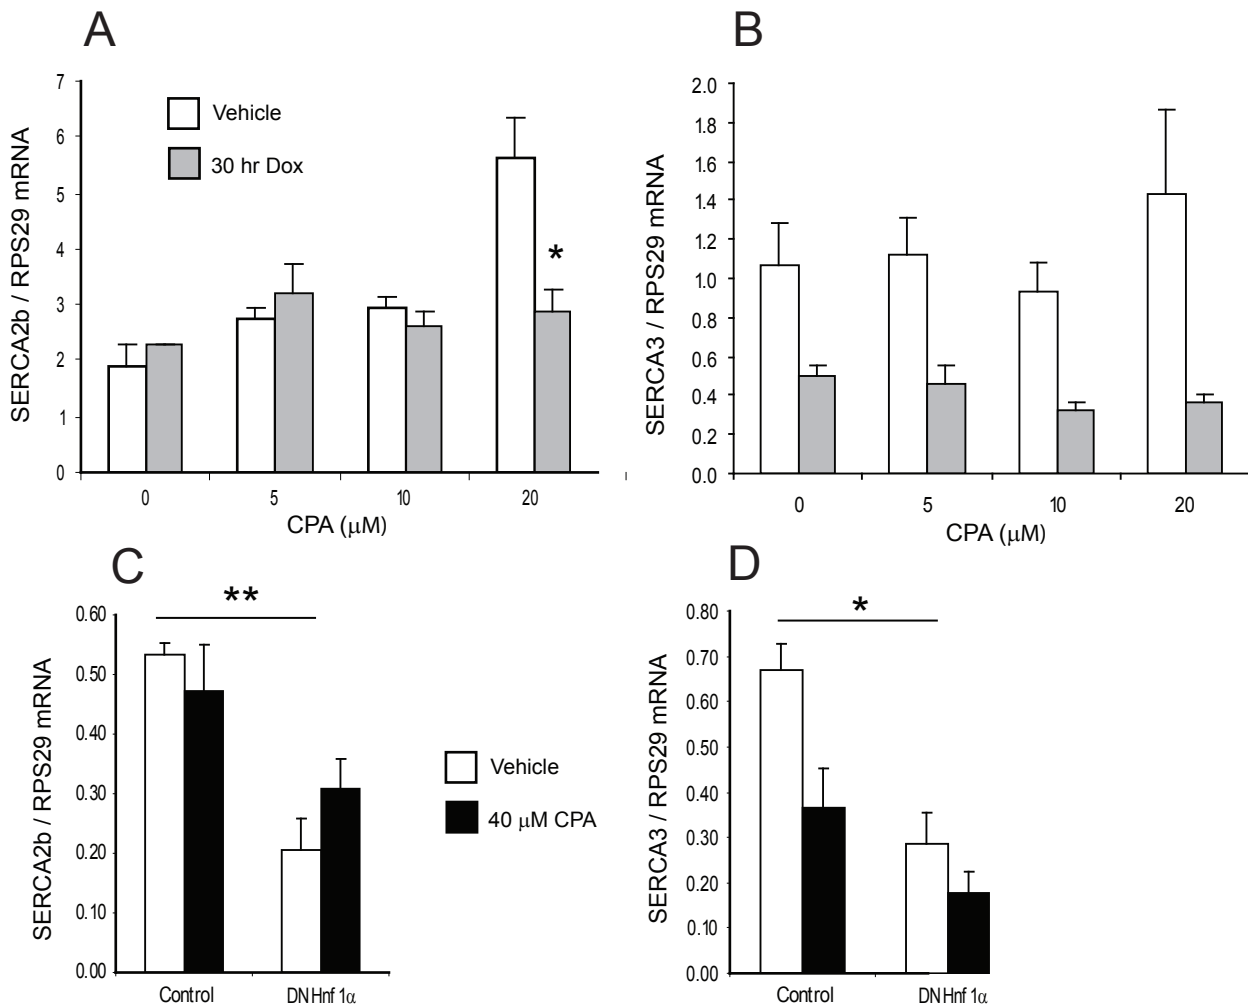

Supplemental Figure 5. SERCA gene expression in DN Hnf1 $\alpha$  cells (A and B) and mice (C and D). Expression of SERCA2b (ubiquitous) and SERCA3 (restricted to  $\beta$ -cells within the islet) was measured in DN Hnf1 $\alpha$  cells pre-exposed to Dox for 24 hours followed by CPA or vehicle for 6 hours, and in mouse islets cultured overnight followed by CPA or vehicle for 6 hours. Data are displayed as mean  $\pm$  SEM, n = 3 for all experiments.

\* indicates p < 0.05, \*\* indicates p < 0.01.

**Supplemental Table S1. Sources and dilution factors of primary antibodies for Western blotting.**

| Protein       | Source                                                            | Catalogue number | Dilution |
|---------------|-------------------------------------------------------------------|------------------|----------|
| Hnf1 $\alpha$ | A gift from Dr R. Cortesi<br>(University of Pomezia, Italy)       | None             | 1/4000   |
| BiP           | Cell Signaling Technology<br>(Bioconcept, Allschwil, Switzerland) | CST #3183        | 1/800    |
| Xbp1          | Santa Cruz Biotechnology<br>(Santa Cruz, CA 95060, USA)           | sc-7160 (M-186)  | 1/100    |
| Atf6          | Lifespan Biosciences<br>(Seattle, WA 98121, USA)                  | LS-C3480         | 1/400    |
| GAPDH         | Sigma<br>(Basel, Switzerland)                                     | G9545            | 1/20000  |

**Supplemental Table S2. Oligonucleotide sequences used in this work for Q-PCR.**

| Primer name               | Sequence (5' – 3')           |
|---------------------------|------------------------------|
| rATF4_5'                  | TGGCCATCTCCCAGAAAGTG         |
| rATF4_3'                  | GGGAAGAGGCTGCAAGAATG         |
| rBIP_5'                   | CACGTCCAACCCGGAGAAC          |
| rBIP_3'                   | TTCCAAGTGCGTCCGATGA          |
| rCHOP_5'                  | GGAAAGTGGCACAGCTTGCT         |
| rCHOP_3'                  | CTGGTCAGGCGCTCGATT           |
| rDNAJC3_5'                | TGAAGCTGCCCAGGAACAG          |
| rDNAJC3_3'                | AGTAACCGCTGGGCTTTCTCT        |
| rPDI_5'                   | AGACAAGGACGTGCTGATCGA        |
| rPDI_3'                   | GTACTTGGGTTCAGGTTCTTACAG     |
| rXBP1_5'                  | TTGTCACCTCCCCAGAACATC        |
| rXBP1_3'                  | AAAGGATATCAGACTCAGAATCTGAAGA |
| rXBP1_NDN_5' <sup>a</sup> | CTCAGTGAAGAAAGAACCTTTGGAT    |
| rXBP1_NDN_3' <sup>a</sup> | GCTGGATGAAAGCAGGTTTGA        |
| rATF6_NDN_5' <sup>b</sup> | GCCATGGAGTCGCCTTTTAG         |
| rATF6_NDN_3' <sup>b</sup> | AAACAACGTGGACTCCCAGTCT       |
| rRPS29_5'                 | GCTGAACATGTGCCGACAGT         |
| rRPS29_3'                 | GGTCGCTTAGTCCA ACTTAATGAAG   |
| mBIP_5'                   | ACCCCGAGAACACGGTCTT          |
| mBIP_3'                   | GCTGCACCGAAGGGTCATT          |
| mCHOP_5'                  | CCACCACACCTGAAAGCAGAA        |
| mCHOP_3'                  | AGGTGAAAGGCAGGGACTCA         |
| mXBP1_5'                  | ATCAGCTTTTACGGGAGAAAATC      |
| mXBP1_3'                  | CCATTCCCAAGCGTGTTCTT         |
| mRPS29_5'                 | CACGGTCTGATCCGCAAAT          |
| mRPS29_3'                 | GCGTACTGCCGGAAGCA            |
| mCYCLO_5'                 | CATGATCGGGAGGGTTTGC          |
| mCYCLO_3'                 | TGATAAAGAACTGAGAGCCATTCG     |

a) Used to detect endogenous Xbp1 in the presence of the DN Xbp1 adenovirus

b) Used to detect endogenous Atf6 in the presence of the DN Atf6 adenovirus

**Supplemental Table S3. Oligonucleotide sequences used in this work for ChIP, EMSA and Xbp1 promoter cloning.**

| Primer name                  | Sequence (5' – 3')          |
|------------------------------|-----------------------------|
| chip_ins1_5'                 | CTCTGGGACAATGATTGTGCTG      |
| chip_ins1_3'                 | GTCGTAATTTCCAAACACTTGCC     |
| chip_xbp1_5'                 | AAATGTATTCTCCCTGTGCAAACCT   |
| chip_xbp1_3'                 | GGTCTAGGCCAGCTGAAGCA        |
| rMyoD1_S                     | AGGAGTAGGCACTGGAGAGACTT     |
| rMyoD1_AS                    | GCCTCAAGCCAATAGGAGTGTAG     |
| xbp1_biot_20_5' <sup>a</sup> | AGTTATTAATTAATTAATCA-biotin |
| xbp1_biot_20_3' <sup>b</sup> | TGATTAATTAATTAATAACT-biotin |
| xbp1_5' <sup>c</sup>         | GTCAGGCTCCAGCGCAGCAA        |
| xbp1_3' <sup>c</sup>         | CCCGGAACCATGAGCGGCAG        |

- a) Sense strand of the EMSA probe for Hnf1 $\alpha$  binding to the Xbp1 promoter  
b) Antisense strand of the EMSA probe for Hnf1 $\alpha$  binding to the Xbp1 promoter  
c) PCR primers for cloning the Xbp1 promoter segment containing the Hnf1 $\alpha$  binding site
